# Supplementary material
Source: Springer Nature journal article supplement (https://www.springermedizin.de/resource/supplementary/13054_2013_2163_MOESM1_ESM.pdf/9712524)
Supplement: MOESM1 [file 9712524]

n = 461,633

OHCA in Japan between January 1, 2007 and December 31, 2010

n = 7,856

Excluded Age <18 years or unknown

n = 28,978

Excluded Due to insufficient information

20,736 ECG data unknown

3,661 AED use unknown

3,194 Epinephrine administration unknown

1,280 Lack of time variables

107 CPC unknown

n = 26,678

Excluded Prehospital any ROSC

n = 398,121

Eligible patients (adult with OHCA without prehospital ROSC)

1-month survival

n = 7,532 (1.89%)

1-month death

n = 390,589 (98.1%)

1-month CPC 1-2

n = 1,957 (0.49%)

1-month CPC 3-5

n = 396,164 (99.5%)
